# Supplementary material for: Linking COVID-19 and Heme-Driven Pathophysiologies: A Combined Computational–Experimental Approach
Source: MDPI journal article supplement (doi:10.3390/biom11050644), 2021-04-27
Supplement: s1 [file s1]

# Supplementary Materials

## Supplementary Figures

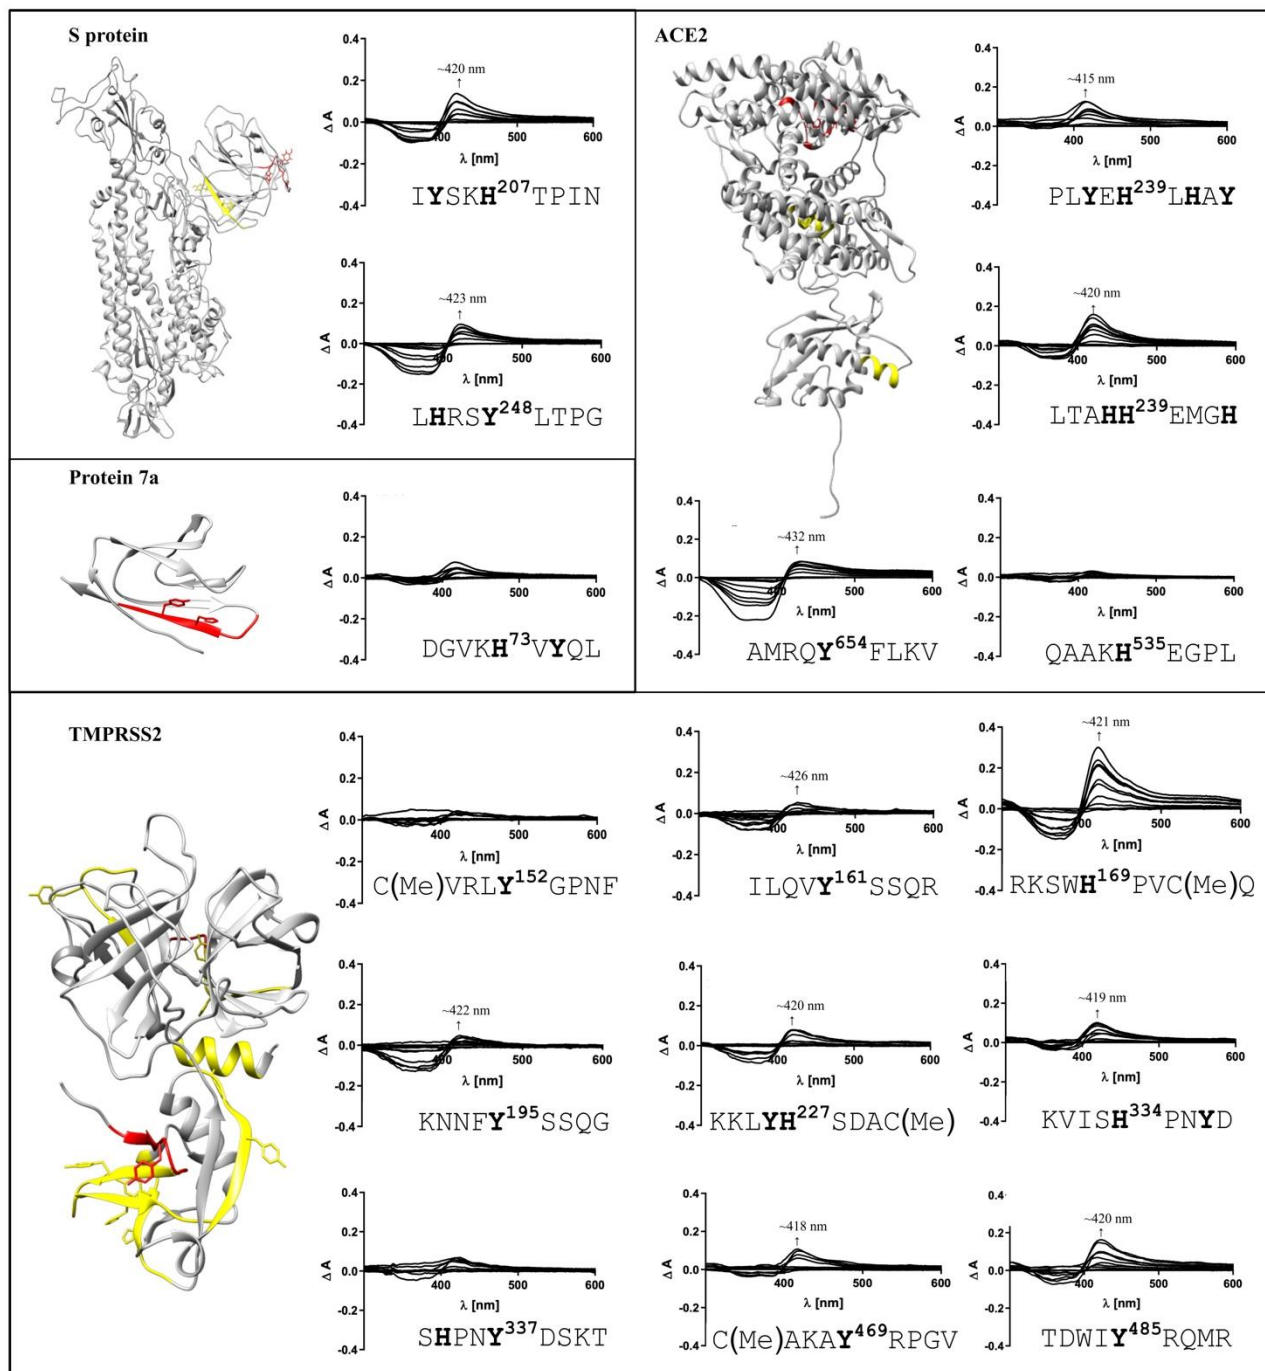

**Figure S1.** Subordinate motifs in SARS-CoV-2 proteins (i.e., S protein and protein 7a) and human host cell proteins (i.e., ACE2 and TMPRSS2). The location of non-binding (red) sequence stretches and moderately binding HBMs (yellow) are highlighted in the respective structure of the proteins (C-I-TASSER model of S protein monomer [1]; PDBs: 6W37 (protein 7a), 6M18 (ACE2); Swiss-model: O15393 (TMPRSS2). Where the heme-binding affinity could not be determined, HBMs are also marked in yellow.

## Supplementary Tables

Table S1. Original evidence for the depicted connections for “Immune Response – Inflammation”.

| Source   | Relation  | Target       | Original evidence                                                                                                                                                                                                                                                                                      | PMID     | Resource    |
|----------|-----------|--------------|--------------------------------------------------------------------------------------------------------------------------------------------------------------------------------------------------------------------------------------------------------------------------------------------------------|----------|-------------|
| COVID-19 | Increases | IL-1 $\beta$ | When <b>COVID-19</b> infects the upper and lower respiratory tract it can cause mild or highly acute respiratory syndrome with consequent release of pro-inflammatory cytokines, including <b>interleukin (IL)-1<math>\beta</math></b> and IL-6.                                                       | 32171193 | COVID-19 KG |
| Heme     | Increases | IL-1 $\beta$ | <b>Heme</b> activates macrophages inducing the production of TNF, KC (Figueiredo et al., 2007), <b>IL-1<math>\beta</math></b> (unpublished), and LTB <sub>4</sub> .                                                                                                                                    | 24904418 | Heme KG     |
| COVID-19 | Increases | IL-6         | When <b>COVID-19</b> infects the upper and lower respiratory tract it can cause mild or highly acute respiratory syndrome with consequent release of pro-inflammatory cytokines, including interleukin (IL)-1 $\beta$ and <b>IL-6</b> .                                                                | 32171193 | COVID-19 KG |
| Heme     | Increases | IL-6         | Likewise, <b>heme</b> and FeNTA treatment causes the induction of the M1 markers MHC II, CD86, CD14, TNF $\alpha$ , <b>IL-6</b> , and IL1 $\beta$ and a decrease in the M2 markers CD206, IL-10, and Arginase-1 (the last with FeNTA only) in M0 BMDMs (Figure 3A; supplemental Figures 5, 6A, and 7). | 26675351 | Heme KG     |
| COVID-19 | Increases | TNF $\alpha$ | Initial plasma IL1B, IL1RA, IL7, IL8, IL9,                                                                                                                                                                                                                                                             | 31986264 | COVID-19 KG |

|              |           |              |                                                                                                                                                                                                                                                                                                                                                                                                                                                                                                 |                          |                        |
|--------------|-----------|--------------|-------------------------------------------------------------------------------------------------------------------------------------------------------------------------------------------------------------------------------------------------------------------------------------------------------------------------------------------------------------------------------------------------------------------------------------------------------------------------------------------------|--------------------------|------------------------|
|              |           |              | IL10, basic FGF, GCSF, GMCSF, IFN $\gamma$ , IP10, MCP1, MIP1A, MIP1B, PDGF, <b>TNF<math>\alpha</math></b> , and VEGF concentrations were higher in both ICU patients and non-ICU patients than in healthy adults (appendix pp 6–7).                                                                                                                                                                                                                                                            |                          |                        |
| Heme         | Increases | TNF $\alpha$ | On the other hand, <b>TNF</b> secretion induced by <b>heme</b> is essential for the activation of the programmed necrotic cell death pathway, which is denominated necroptosis. Likewise, <b>heme</b> and FeNTA treatment causes the induction of the M1 markers MHC-II, CD86, CD14, <b>TNF<math>\alpha</math></b> , IL-6, and IL1 $\beta$ and a decrease in the M2 markers CD206, IL-10, and Arginase-1 (the last with FeNTA only) in M0 BMDMs (Figure 3A; supplemental Figures 5, 6A, and 7). | 24904418<br><br>26675351 | Heme KG<br><br>Heme KG |
| TNF $\alpha$ | Increases | TLR4         | Heme also induces tumour necrosis factor ( <b>TNF</b> ) secretion in monocyte/macrophages through <b>TLR4</b> and the adaptor molecule, MYD88/.                                                                                                                                                                                                                                                                                                                                                 | 25307023                 | Heme KG                |
| Heme         | Increases | TLR4         | <b>Heme</b> also induces tumour necrosis factor ( <b>TNF</b> ) secretion in monocyte/macrophages through <b>TLR4</b> and the adaptor molecule, MYD88/.                                                                                                                                                                                                                                                                                                                                          | 25307023                 | Heme KG                |
| TLR4         | Increases | MyD88        | The <b>TLR4</b> activates two distinct pathways: <b>MyD88</b>                                                                                                                                                                                                                                                                                                                                                                                                                                   | 24904418                 | Heme KG                |

# Supplementary Materials

|          |           |       |                                                                                                                                                                                                                                                                                                     |          |             |
|----------|-----------|-------|-----------------------------------------------------------------------------------------------------------------------------------------------------------------------------------------------------------------------------------------------------------------------------------------------------|----------|-------------|
|          |           |       | and TRIF. In macrophages, heme induces a biased MyD88 activation and the secretion of the pro-inflammatory cytokines TNF and KC.                                                                                                                                                                    |          |             |
| MyD88    | Increases | NF-κB | Only under protein-free conditions did we observe a limited heme-induced TNF-α response in cultured macrophages, which was triggered via signaling of the classical TLR4- <b>MyD88</b> -TRIF pathway of <b>NF-κB</b> activation.                                                                    | 29610666 | Heme KG     |
| NF-κB    | Increases | IL-6  | The MyD88-dependent pathway leads to the activation of mitogen-activated protein kinases (MAPKs) and <b>NF-κB</b> (nuclear factor kappa-light-chain-enhancer of activated B cells) transcription factors inducing the expression of inflammatory cytokines such as TNF, <b>IL-6</b> , IL-1β, and KC | 24904418 | Heme KG     |
| COVID-19 | Increases | IL-8  | Initial plasma IL1B, IL1RA, IL7, <b>IL8</b> , IL9, IL10, basic FGF, GCSF, GMCSF, IFNγ, IP10, MCP1, MIP1A, MIP1B, PDGF, TNFα, and VEGF concentrations were higher in both ICU patients and non-ICU patients than in healthy adults (appendix pp 6–7).                                                | 31986264 | COVID-19 KG |
| Heme     | Increases | IL-8  | Incubation of neutrophils with 4 mM <b>hemin</b> resulted in a 2-fold increase in <b>CXCL8</b> mRNA expression                                                                                                                                                                                      | 28716864 | Heme KG     |

|          |           |       |                                                                                                                                                                                                                                                                                                                                                                                                                                                                                                                                                                    |          |             |
|----------|-----------|-------|--------------------------------------------------------------------------------------------------------------------------------------------------------------------------------------------------------------------------------------------------------------------------------------------------------------------------------------------------------------------------------------------------------------------------------------------------------------------------------------------------------------------------------------------------------------------|----------|-------------|
|          |           |       | and in a significant increase in released and cell-associated levels of IL-8 protein compared with the untreated controls or A1AT-treated cells (Fig. 7A–C).                                                                                                                                                                                                                                                                                                                                                                                                       |          |             |
| COVID-19 | Increases | CD14  | Although patients had higher <b>sCD14</b> levels than healthy people, there were no significant differences between the severe and mild groups (Fig. 1b).                                                                                                                                                                                                                                                                                                                                                                                                          | 32203186 | COVID-19 KG |
| Heme     | Increases | CD14  | Likewise, <b>heme</b> and FeNTA treatment causes the induction of the M1 markers MHC-II, CD86, <b>CD14</b> , TNF $\alpha$ , IL-6, and IL1 $\beta$ and a decrease in the M2 markers CD206, IL-10, and Arginase-1 (the last with FeNTA only) in M0 BMDMs (Figure 3A; supplemental Figures 5, 6A, and 7).                                                                                                                                                                                                                                                             | 26675351 | Heme KG     |
| COVID-19 | Increases | IL-10 | Significantly high blood levels of cytokines and chemokines were noted in patients with <b>COVID-19</b> infection that included IL1- $\beta$ , IL1RA, IL7, IL8, IL9, <b>IL10</b> , basic FGF2, GCSF, GMCSF, IFN $\gamma$ , IP10, MCP1, MIP1 $\alpha$ , MIP1 $\beta$ , PDGFB, TNF $\alpha$ , and VEGFA. Some of the severe cases that were admitted to the intensive care unit showed high levels of pro-inflammatory cytokines including IL2, IL7, <b>IL10</b> , GCSF, IP10, MCP1, MIP1 $\alpha$ , and TNF $\alpha$ that are reasoned to promote disease severity. | 32113704 | COVID-19 KG |

# Supplementary Materials

|      |           |       |                                                                                                                                                                                                                                                                        |          |             |
|------|-----------|-------|------------------------------------------------------------------------------------------------------------------------------------------------------------------------------------------------------------------------------------------------------------------------|----------|-------------|
|      |           |       | Initial plasma IL1B, IL1RA, IL7, IL8, IL9, <b>IL10</b> , basic FGF, GCSF, GMCSF, IFN $\gamma$ , IP10, MCP1, MIP1A, MIP1B, PDGF, TNF $\alpha$ , and VEGF concentrations were higher in both ICU patients and non-ICU patients than in healthy adults (appendix pp 6–7). | 31986264 | COVID-19 KG |
| Heme | Increases | IL-10 | Interestingly, <b>heme</b> (10–30 $\mu$ M) was also able to induce the secretion of <b>IL-10</b> , an anti-inflammatory cytokine.                                                                                                                                      | 23690673 | Heme KG     |

**Table S2.** Original evidence for the depicted connections for “Immune Response – Complement system”.

| Source   | Relation  | Target | Original Evidence                                                                                                                                                                                                                                                                                                | PMID/doi | Resource    |
|----------|-----------|--------|------------------------------------------------------------------------------------------------------------------------------------------------------------------------------------------------------------------------------------------------------------------------------------------------------------------|----------|-------------|
| COVID-19 | Increases | C3     | <b>C3</b> activation products (C3 fragments C3a, C3b, iC3b, C3dg, and C3c) were detected by Western blotting in lung tissue of SARS-CoV MA15-infected mice, but not in control mice, as early as 1 day post infection (dpi) (Fig. 1B), confirming that SARS-CoV MA15 infection activates the complement pathway. | 30301856 | COVID-19 KG |
| Heme     | Increases | C3     | Furthermore, the incubation of serum or whole blood with <b>heme</b> induces deposition of activation fragments (C3b, iC3b, C3dg) of <b>complement component 3</b> (C3) at the surface of erythrocytes                                                                                                           | 26875449 | Heme KG     |

|          |           |                       |                                                                                                                                                                                                                                                                                                                                    |                           |             |
|----------|-----------|-----------------------|------------------------------------------------------------------------------------------------------------------------------------------------------------------------------------------------------------------------------------------------------------------------------------------------------------------------------------|---------------------------|-------------|
| COVID-19 | Increases | Complement activation | C3 activation products (C3 fragments C3a, C3b, iC3b, C3dg, and C3c) were detected by Western blotting in lung tissue of SARS-CoV MA15-infected mice, but not in control mice, as early as 1 day post infection (dpi) (Fig. 1B), confirming that SARS-CoV MA15 infection <b>activates the complement pathway</b> .                  | 30301856                  | COVID-19 KG |
| Heme     | Increases | Complement activation | Hemolytic diseases are often accompanied by dysregulation and <b>overactivation of the complement system</b> [72–74], which may be induced by free extracellular <b>heme</b> .                                                                                                                                                     | 26875449                  | Heme KG     |
| COVID-19 | Increases | Neutrophil activation | The common clinical manifestations of fever and cough in conjunction with laboratory results of progressively increasing neutrophil counts and leukocytopenia in serum samples taken from <b>COVID-19</b> patients at various stages of the illness indicates uncontrolled <b>neutrophil</b> extravasation and <b>activation</b> . | 10.1101/2020.03.31.019216 | COVID-19 KG |
| Heme     | Increase  | Neutrophil activation | <b>Heme-induced neutrophils activation</b> leads to extracellular traps (NETs) release through a mechanism dependent on ROS generation.                                                                                                                                                                                            | 24904418                  | Heme KG     |
| Heme     | Increases | C5a                   | C3a and <b>C5a</b> anaphylatoxins, as well as the soluble membrane attack complex (sC5b9), are generated by incubation                                                                                                                                                                                                             | 26875449                  | Heme KG     |

## Supplementary Materials

|  |  |  |                                                                                             |  |  |
|--|--|--|---------------------------------------------------------------------------------------------|--|--|
|  |  |  | of <b>heme</b> with human serum or blood in vitro, via the alternative complement pathway). |  |  |
|--|--|--|---------------------------------------------------------------------------------------------|--|--|

**Table S3.** Original evidence for the depicted connections for “Blood and coagulation system”.

| Source   | Relation  | Target                 | Original Evidence                                                                                                                                                                                                                                                                   | PMID     | Resource    |
|----------|-----------|------------------------|-------------------------------------------------------------------------------------------------------------------------------------------------------------------------------------------------------------------------------------------------------------------------------------|----------|-------------|
| COVID-19 | Decreases | Albumin                | <b>Albumin</b> concentrations were significantly lower in deceased patients than in recovered patients.                                                                                                                                                                             | 32217556 | COVID-19 KG |
| Albumin  | Decreases | Heme                   | Serum <b>albumin</b> (SA) can act as the heme scavenger by forming <b>heme-SA</b> complex [2, 4–8].                                                                                                                                                                                 | 30324533 | Heme KG     |
| COVID-19 | Increases | Ferritin               | Levels of lactate dehydrogenase (LDH), concentrations of serum high-sensitivity C-reactive protein (hsCRP), <b>ferritin</b> and D-dimer levels were markedly higher in severe cases than moderate cases.                                                                            | 32217835 | COVID-19 KG |
| Heme     | Increases | Ferritin               | In agreement with the electrical cell–substrate impedance sensing data described above, the proteome changes triggered by 10 $\mu$ M <b>heme</b> were indicative of an adaptive response with prominent induction of HMOX1 and <b>ferritin</b> light (FTL) and heavy (FTH1) chains. | 26794659 | Heme KG     |
| COVID-19 | Decreases | Plasminogen activation | Figure 2. GO-term and KEGG pathway enrichment of up-regulated                                                                                                                                                                                                                       | 32228226 | COVID-19 KG |



|            |           |                      |                                                                                                                                                                                                                                                                                                                                           |          |             |
|------------|-----------|----------------------|-------------------------------------------------------------------------------------------------------------------------------------------------------------------------------------------------------------------------------------------------------------------------------------------------------------------------------------------|----------|-------------|
|            |           |                      | expressed genes in BALF and PBMC of COVID-19 patients. [figure content]                                                                                                                                                                                                                                                                   |          |             |
| COVID-19   | Decreases | Platelet count       | Remarkable abnormalities in the CBC were detected on January 29, including increased neutrophils ( $10.67 \times 10^9/L$ ), leukocytes ( $11.73 \times 10^9/L$ ), and decreased lymphocytes ( $0.51 \times 10^9 /L$ ), and on February 4 decreased erythrocytes ( $2.40 \times 10^{12}/L$ ) and <b>platelets</b> ( $73 \times 10^9 /L$ ). | 32196678 | COVID-19 KG |
| Heme       | Increases | Platelet aggregation | 1 <b>Heme</b> induces <b>platelet</b> activation and <b>aggregation</b> through different pathways                                                                                                                                                                                                                                        | 26875449 | Heme KG     |
| Heme       | Decreases | Fibrin               | From another perspective, in vitro assays have demonstrated that <b>heme</b> can also bind to fibrinogen and decrease its thrombin-mediated cleavage, thus affecting the final common coagulation pathway and reducing <b>fibrin formation</b> , important in clotting (Figure 1).                                                        | 26875449 | Heme KG     |
| Fibrin     | Increases | Hemoglobin           | During DIC, <b>fibrin</b> strands within the fibrin mesh formed could cut red blood cells, resulting in the formation of schistocytes (strongly deformed red blood cells or fragments of red blood cells) and the release of <b>hemoglobin</b> .                                                                                          | 29956069 | Heme KG     |
| Hemoglobin | Increases | Heme                 | Toxicity of free <b>hemoglobin</b> is also caused by the release of cell-free <b>heme</b> , which produces lipid                                                                                                                                                                                                                          | 27515135 | Heme KG     |

## Supplementary Materials

|            |           |                      |                                                                                                                                                                                                        |          |         |
|------------|-----------|----------------------|--------------------------------------------------------------------------------------------------------------------------------------------------------------------------------------------------------|----------|---------|
|            |           |                      | peroxidation and mitochondrial damage and increases the production of reactive oxygen species.                                                                                                         |          |         |
| Hemoglobin | Increases | Platelet aggregation | When RBCs are damaged by high shear in continuous flow ventricular assist devices, free <b>hemoglobin</b> induces <b>platelet aggregation</b> , contributing to high risk of thrombotic complications. | 28458720 | Heme KG |

**Table S4.** Original evidence for the depicted connections for “Organ-specific diagnostic markers”.

| Source    | Relation  | Target    | Original Evidence                                                                                                                                                                                                                  | PMID     | Resource    |
|-----------|-----------|-----------|------------------------------------------------------------------------------------------------------------------------------------------------------------------------------------------------------------------------------------|----------|-------------|
| Hemolysis | Increases | Heme      | Free <b>heme</b> is generated by intra- and extravascular <b>hemolysis</b> or extensive cell damage.                                                                                                                               | 24464629 | Heme KG     |
| Hemolysis | Increases | Bilirubin | LDH was strongly associated with markers normally elevated in either <b>hemolysis</b> or liver disease, including aspartate aminotransferase (AST) and direct and indirect <b>bilirubin</b> .                                      | 16291595 | Heme KG     |
| COVID-19  | Increases | Bilirubin | Concentrations of alanine aminotransferase, aspartate aminotransferase, total <b>bilirubin</b> , alkaline phosphatase, and $\gamma$ -glutamyl transpeptidase were markedly higher in deceased patients than in recovered patients. | 32217556 | COVID-19 KG |
| Heme      | Increases | Bilirubin | The present findings demonstrate that the enzymatic mechanism                                                                                                                                                                      | 4334719  | Heme KG     |

|           |           |     |                                                                                                                                                                                                            |          |             |
|-----------|-----------|-----|------------------------------------------------------------------------------------------------------------------------------------------------------------------------------------------------------------|----------|-------------|
|           |           |     | catalyzing the conversion of <b>heme</b> to <b>bilirubin</b> in the liver is under hormonal control.                                                                                                       |          |             |
| Hemolysis | Increases | LDH | <b>LDH</b> was strongly associated with markers normally elevated in either <b>hemolysis</b> or liver disease, including aspartate aminotransferase (AST) and direct and indirect bilirubin.               | 16291595 | Heme KG     |
| COVID-19  | Increases | LDH | Levels of lactate dehydrogenase ( <b>LDH</b> ), concentrations of serum high-sensitivity C-reactive protein (hsCRP), ferritin and D-dimer levels were markedly higher in severe cases than moderate cases. | 32217835 | COVID-19 KG |

**Table S5.** Concordance between the common interactions and experimental data from Blanco-Melo et al. 2020 [2].

| Pathway                      | Gene symbol | Cell MMC2 | Consistency MMC2 | Cell MMC4 | Consistency MMC4 |
|------------------------------|-------------|-----------|------------------|-----------|------------------|
| Immune system - Inflammation | NF-κB       | 0.4984    | yes              | 0.6478    | yes              |
|                              | MyD88       | 0.199     | yes              | 1.519     | yes              |
|                              | IL-6        | 2.390     | yes              | -0.517    | no               |
|                              | TLR4        | 0.1533    | yes              | 1.917     | yes              |
|                              | IL-1β       | 1.036     | yes              | 2.354     | yes              |
|                              | CD14        | -0.4775   | no               | 0.297     | yes              |
|                              | IL-10       | 0.539     | yes              | 4.038     | yes              |
|                              | TNFα        | 1.333     | yes              | 4.005     | yes              |

# Supplementary Materials

|                                   |            |        |     |         |     |
|-----------------------------------|------------|--------|-----|---------|-----|
| Immune system - Complement system | C3         | 1.455  | yes | 0.760   | yes |
|                                   | C5         | 0.050  | --  | -1.392  | --  |
| Blood coagulation system          | Hemoglobin | --     | --  | --      | --  |
|                                   | Ferritin   | 0.047  | yes | 1.690   | yes |
|                                   | Albumin    | 0.0363 | no  | -0.1999 | yes |
| Organ-specific diagnostic markers | LDHA       | 0.225  | yes | 0.658   | yes |
|                                   | LDHB       | 0.0    | --  | -0.738  | no  |
|                                   | LDHC       | 0.043  | yes | -0.979  | no  |

**Table S6.** Characterization of potential heme-binding motifs within SARS-CoV-2 proteins (i.e., S protein and protein 7a) and human host cell proteins (i.e., ACE2 and TMPRSS2). Lines are highlighted according to the heme-binding affinity of the respective peptide (high (green) and moderate (yellow) heme-binding affinity, grey: heme-binding affinity could not be determined with UV/vis spectroscopy, red: not heme-binding)

| General information |                             |                                                      | Analytical characterization of peptides |                           |                                            | Heme-binding properties      |                  |
|---------------------|-----------------------------|------------------------------------------------------|-----------------------------------------|---------------------------|--------------------------------------------|------------------------------|------------------|
| No.                 | Sequence                    | Position <sup>a</sup>                                | Mw <sup>a</sup> (Mw theor.) [g/mol]     | HPLC t <sub>R</sub> [min] | TLC R <sub>f</sub>                         | K <sub>D</sub> [μM]          | Soret shift [nm] |
| <b>S protein</b>    |                             |                                                      |                                         |                           |                                            |                              |                  |
| <b>1</b>            | FLGV <b>YY</b> HKN          | F <sup>140</sup> - N <sup>148</sup> ,<br>extravirion | 1039.637<br>(1138.581)                  | 18.167 <sup>b</sup>       | 0.479 <sup>f</sup> ,<br>0.770 <sup>g</sup> | 0.96 ±<br>0.47 <sup>o</sup>  | ~418             |
| <b>2</b>            | I <b>Y</b> SK <b>H</b> TPIN | I <sup>203</sup> - N <sup>211</sup> ,<br>extravirion | 1071.649<br>(1070.576)                  | 19.989 <sup>c</sup>       | 0.288 <sup>f</sup> ,<br>0.283 <sup>h</sup> | 7.87 ±<br>0.64 <sup>p</sup>  | ~420             |
| <b>3</b>            | L <b>HRSY</b> LTPG          | L <sup>244</sup> - G <sup>252</sup> ,<br>extravirion | 1042.599<br>(1041.561)                  | 14.167 <sup>b</sup>       | 0.342 <sup>f</sup> ,<br>0.383 <sup>i</sup> | 26.09 ±<br>4.75 <sup>p</sup> | ~423             |

| Protein 7a |                          |                                                                  |                        |                     |                                            |                              |         |
|------------|--------------------------|------------------------------------------------------------------|------------------------|---------------------|--------------------------------------------|------------------------------|---------|
| 4          | DGVK <b>HVY</b> QL       | D <sup>69</sup> - L <sup>77</sup> ,<br>extravirion               | 1057.612<br>(1056.561) | 14.172 <sup>b</sup> | 0.250 <sup>f</sup> ,<br>0.800 <sup>g</sup> | n. b.                        | -       |
| 5          | VK <b>HVY</b> QLRA       | V <sup>71</sup> - A <sup>79</sup> ,<br>extravirion               | 1142.685<br>(1141.613) | 13.133 <sup>b</sup> | 0.130 <sup>i</sup> ,<br>0.120 <sup>f</sup> | n. sat.                      | ~419    |
| ACE2       |                          |                                                                  |                        |                     |                                            |                              |         |
| 6          | PL <b>YEHLHAY</b>        | P <sup>235</sup> - Y <sup>243</sup> ,<br>extracellular<br>domain | 1141.605<br>(1140.561) | 17.750 <sup>b</sup> | 0.149 <sup>h</sup> ,<br>0.831 <sup>k</sup> | 4.04 ±<br>1.20 <sup>p</sup>  | ~415    |
| 7          | LT <b>AHHEM</b> GH       | L <sup>370</sup> - H <sup>378</sup> ,<br>extracellular<br>domain | 1131.542<br>(1130.466) | 17.360 <sup>c</sup> | 0.321 <sup>h</sup> ,<br>0.831 <sup>k</sup> | 21.45 ±<br>1.54 <sup>p</sup> | ~420    |
| 8          | SFIR <b>YY</b> TRT       | S <sup>511</sup> - T <sup>519</sup> ,<br>extracellular<br>domain | 1205.676<br>(1204.624) | 17.900 <sup>b</sup> | 0.120 <sup>i</sup> ,<br>0.750 <sup>l</sup> | 0.60 ±<br>0.33 <sup>p</sup>  | ~424    |
| 9          | QAAK <b>H</b> EGPL       | Q <sup>531</sup> - L <sup>539</sup> ,<br>extracellular<br>domain | 949.525<br>(948.502)   | 19.834 <sup>c</sup> | 0.666 <sup>g</sup> ,<br>0.233 <sup>l</sup> | n. b.                        | -       |
| 10         | AMRQ <b>Y</b> FLKV       | A <sup>650</sup> - V <sup>658</sup> ,<br>extracellular<br>domain | 1154.654<br>(1153.632) | 15.131 <sup>d</sup> | 0.881 <sup>k</sup> ,<br>0.783 <sup>l</sup> | 5.01 ±<br>0.78 <sup>p</sup>  | ~432    |
| TMPRSS2    |                          |                                                                  |                        |                     |                                            |                              |         |
| 11         | C (Me) VRL <b>Y</b> GPNF | C <sup>148</sup> - F <sup>156</sup> ,<br>extracellular<br>domain | 1081.615<br>(1080.527) | 14.683 <sup>d</sup> | 0.242 <sup>g</sup> ,<br>0.842 <sup>l</sup> | n. b.                        | -       |
| 12         | ILQV <b>Y</b> SSQR       | I <sup>157</sup> - R <sup>165</sup> ,<br>extracellular<br>domain | 1092.592<br>(1091.598) | 15.759 <sup>b</sup> | 0.385 <sup>g</sup> ,<br>0.760 <sup>l</sup> | n. sat.                      | ~426 nm |
| 13         | RKSW <b>H</b> PVC (Me) Q | R <sup>165</sup> - Q <sup>173</sup> ,<br>extracellular<br>domain | 1153.629<br>(1152.271) | 13.408 <sup>b</sup> | 0.182 <sup>g</sup> ,<br>0.189 <sup>m</sup> | 33.44 ±<br>0.89 <sup>p</sup> | ~421 nm |
| 14         | RDMG <b>Y</b> KNNF       | R <sup>186</sup> - F <sup>194</sup> ,<br>extracellular<br>domain | 1043.551<br>(1142.518) | 12.287 <sup>b</sup> | 0.192 <sup>g</sup> ,<br>0.436 <sup>l</sup> | 0.94 ±<br>0.38 <sup>p</sup>  | ~422 nm |

## Supplementary Materials

|           |                 |                                                                  |                        |                     |                                            |                             |         |
|-----------|-----------------|------------------------------------------------------------------|------------------------|---------------------|--------------------------------------------|-----------------------------|---------|
| <b>15</b> | KNNFYSSQG       | K <sup>191</sup> - G <sup>199</sup> ,<br>extracellular<br>domain | 1043.488<br>(1042.472) | 19.297 <sup>c</sup> | 0.130 <sup>j</sup> ,<br>0.435 <sup>n</sup> | n. sat.                     | ~422 nm |
| <b>16</b> | KKLYHSDAC (Me)  | K <sup>223</sup> - C <sup>231</sup> ,<br>extracellular<br>domain | 1077.615<br>(1076.517) | 19.235 <sup>c</sup> | 0.365 <sup>g</sup> ,<br>0.151 <sup>l</sup> | n. sat.                     | ~420 nm |
| <b>17</b> | KVISHPNYD       | K <sup>330</sup> - D <sup>338</sup> ,<br>extracellular<br>domain | 1071.553<br>(1070.540) | 19.777 <sup>c</sup> | 0.721 <sup>g</sup> ,<br>0.106 <sup>h</sup> | 7.31 ±<br>0.59 <sup>p</sup> | ~419 nm |
| <b>18</b> | SHPNYDSKT       | S <sup>333</sup> - T <sup>341</sup> ,<br>extracellular<br>domain | 1047.522<br>(1046.467) | 14.999 <sup>e</sup> | 0.451 <sup>g</sup> ,<br>0.113 <sup>l</sup> | n. b.                       | -       |
| <b>19</b> | C (Me) AKAYRPGV | C <sup>465</sup> - V <sup>473</sup> ,<br>extracellular<br>domain | 977.575<br>(976.501)   | 19.748 <sup>c</sup> | 0.260 <sup>k</sup> ,<br>0.566 <sup>l</sup> | n. sat.                     | ~418 nm |
| <b>20</b> | TDWIYRQMR       | C <sup>481</sup> - V <sup>489</sup> ,<br>extracellular<br>domain | 1267.620<br>(1266.618) | 14.254 <sup>d</sup> | 0.380 <sup>k</sup> ,<br>0.717 <sup>l</sup> | 5.77 ±<br>0.89 <sup>p</sup> | ~420 nm |

<sup>a</sup>Mass peaks were detected as [M+H]<sup>+</sup>. <sup>b</sup>HPLC conditions were as follows: water with 0.1% TFA (eluent A), acetonitrile with 0.1% TFA (eluent B): 10% - 40% eluent B in 30 min. <sup>c</sup>HPLC conditions were as follows: water with 0.1% TFA (eluent A), acetonitrile with 0.1% TFA (eluent B): 0% - 40% eluent B in 40 min. <sup>d</sup>HPLC conditions were as follows: water with 0.1% TFA (eluent A), acetonitrile with 0.1% TFA (eluent B): 15% - 45% eluent B in 30 min. <sup>e</sup>HPLC conditions were as follows: water with 0.1% TFA (eluent A), acetonitrile with 0.1% TFA (eluent B): 0% - 30% eluent B in 30 min. <sup>f</sup>The following TLC system was used: pyridine/ethyl acetate/acetic acid/water (5:5:1:3, v/v). <sup>g</sup>The following TLC system was used: water/methanol/25% ammonia (10:90:25, v/v). <sup>h</sup>The following TLC system was used: 25% ammonia/n-propanol (3:7, v/v). <sup>i</sup>The following TLC system was used: methanol/acetic acid (10:15, v/v). <sup>j</sup>The following TLC system was used: acetonitrile/water/TFA (50:50:0.1, v/v). <sup>k</sup>The following TLC system was used: water/methanol/25% ammonia (25:75:15, v/v). <sup>l</sup>The following TLC system was used: pyridine/ethyl acetate/acetic acid/water (36:36:7:21, v/v). <sup>m</sup>The following TLC system was used: water/methanol/25% ammonia (75:25:15, v/v). <sup>n</sup>The following TLC system was used: hexan/ethyl acetate (8:2, v/v). <sup>o</sup>K<sub>D</sub> value was determined according to the best fit, suggesting a stoichiometry of 1:2 peptide to heme. <sup>p</sup>K<sub>D</sub> values were determined according to the best fit, suggesting a stoichiometry of 1:1 peptide to heme. HPLC: high-performance liquid chromatography, K<sub>D</sub>: dissociation constant, Mw: molecular weight, n. b.: no binding, n. sat.: not saturated, R<sub>r</sub>: retention factor, TLC: thin-layer chromatography, tr: retention time.

## Supplementary References

- Zhang, C.; Zheng, W.; Huang, X.; Bell, E.W.; Zhou, X.; Zhang, Y. Protein structure and sequence reanalysis of 2019-nCoV genome refutes snakes as its intermediate host and the unique similarity between Its spike protein Insertions and HIV-1. *J. Proteome Res.* **2020**, *19*, 1351–1360.
- Blanco-Melo, D.; Nilsson-Payant, B.E.; Liu, W.-C.; Uhl, S.; Hoagland, D.; Møller, R.; Jordan, T.X.; Oishi, K.; Panis, M.; Sachs, D.; et al. Imbalanced host response to SARS-CoV-2 drives development of COVID-19. *Cell* **2020**, *181*, 1036-1045.e9.
